# Supplementary material for: Specific deletion of Axin1 leads to activation of β-catenin/BMP signaling resulting in fibular hemimelia phenotype in mice
Source: eLife journal article supplement (doi:10.7554/elife.80013), 2022-12-21
Supplement: supp [file Figure 1-source data 2 Axin1+ cells (%).xlsx]

## Sheet: Sheet1
	Fig 1B-Source Data 1B Axin1+ cells (%)
	Ctr			Axin1Prx1-Cre
	Positive	Total	%	Positive	Total	%
	213	522	0.408046	26	335	0.0776119
	202	507	0.398422	85	480	0.177083
	233	512	0.455078	117	488	0.239754
