# Supplementary material for: Specific deletion of Axin1 leads to activation of β-catenin/BMP signaling resulting in fibular hemimelia phenotype in mice
Source: eLife journal article supplement (doi:10.7554/elife.80013), 2022-12-21
Supplement: supp [file Figure 1-source data 3 β-catenin+ cells (%).xlsx]

## Sheet: Sheet1
	Fig 1D-Source Data 1D β-catenin+ cells (%)
	Ctr			Axin1Prx1-Cre
	Positive	Total	%	Positive	Total	%
	112	562	0.199288	245	450	0.544444
	89	672	0.13244	212	510	0.415686
	212	660	0.321212	476	535	0.88972
