# Supplementary material for: Specific deletion of Axin1 leads to activation of β-catenin/BMP signaling resulting in fibular hemimelia phenotype in mice
Source: eLife journal article supplement (doi:10.7554/elife.80013), 2022-12-21
Supplement: supp [file Figure 2-Source Data 2 Length of femur (mm).xlsx]

## Sheet: Sheet1
	Fig 2D-Source Data 2D Length of femur (mm)
	Femur	mm
	Ctr	Axin1Prx1-Cre
	9.9	8.04
	12.1	8.65
	11.7	8.8
