# Supplementary material for: Specific deletion of Axin1 leads to activation of β-catenin/BMP signaling resulting in fibular hemimelia phenotype in mice
Source: eLife journal article supplement (doi:10.7554/elife.80013), 2022-12-21
Supplement: supp [file Figure 2-Source Data 3 Length of tibia (mm).xlsx]

## Sheet: Sheet1
	Fig 2E-Source Data 2E Length of tibia (mm)
	Tibia	mm
	Ctr	Axin1Prx1-Cre
	13.4	13.1
	13.4	13.2
	13.6	12.9
