# Supplementary material for: Specific deletion of Axin1 leads to activation of β-catenin/BMP signaling resulting in fibular hemimelia phenotype in mice
Source: eLife journal article supplement (doi:10.7554/elife.80013), 2022-12-21
Supplement: supp [file Figure 3-Source Data 2 N.OC B.Pm ( mm,mm2).xlsx]

## Sheet: Sheet1
	Fig 3H-Source Data 3H N.OC/B.Pm (/mm,mm2)
	Control	Axin1Prx1-Cre
	104.532	21.9373
	114.241	37.8543
	90.3033	42.0903
	114.865	20.8377
