# Supplementary material for: Specific deletion of Axin1 leads to activation of β-catenin/BMP signaling resulting in fibular hemimelia phenotype in mice
Source: eLife journal article supplement (doi:10.7554/elife.80013), 2022-12-21
Supplement: supp [file Figure 3-Source Data 3 % VEGF-Positive Area ROI.xlsx]

## Sheet: Sheet1
	Fig 3L-Source Data 3L % VEGF-Positive Area/ROI
	Control	Axin1Prx1-Cre
	0.938528	0.444052
	1.04887	0.521648
	1.0126	0.504008
