# Supplementary material for: Specific deletion of Axin1 leads to activation of β-catenin/BMP signaling resulting in fibular hemimelia phenotype in mice
Source: eLife journal article supplement (doi:10.7554/elife.80013), 2022-12-21
Supplement: supp [file Figure 4-Source Data 2 Bone Volume (%, BV TV).xlsx]

## Sheet: Sheet1
	Figure 4-Source Data 4C Bone Volume (%, BV/TV)
	Control	Axin1 KO	Rescue
	28	87	69
	19	94	71
	22	92	68
	23	95	76
