# Supplementary material for: Specific deletion of Axin1 leads to activation of β-catenin/BMP signaling resulting in fibular hemimelia phenotype in mice
Source: eLife journal article supplement (doi:10.7554/elife.80013), 2022-12-21
Supplement: supp [file Figure 5-Source Data 2 Bmp4 mRNA level.xlsx]

## Sheet: Sheet1
	Figure 5B BMP4-Source Data 5B Bmp4 mRNA level
	Cre-	Axin1Prx1-Cre
	1	1.86
	1	1.84
	1	2.21
