# Supplementary material for: Specific deletion of Axin1 leads to activation of β-catenin/BMP signaling resulting in fibular hemimelia phenotype in mice
Source: eLife journal article supplement (doi:10.7554/elife.80013), 2022-12-21
Supplement: supp [file Figure 5-Source Data 4 Gremlin mRNA level.xlsx]

## Sheet: Sheet1
	Figure 5D Gremlin-Source Data 5E Gremlin mRNA level
	Cre-	Axin1Prx1-Cre
	1	1.47
	1	1.52
	1	1.66
