# Supplementary material for: Specific deletion of Axin1 leads to activation of β-catenin/BMP signaling resulting in fibular hemimelia phenotype in mice
Source: eLife journal article supplement (doi:10.7554/elife.80013), 2022-12-21
Supplement: supp [file Figure 6-Source Data 3 pSmad5 β-Actin.xlsx]

## Sheet: Sheet1
	Figure 6 C-Source Data 6C pSmad5/β-Actin
		WT	Axin1 KO
	No BMP	0.039523	0.08591
	0	2.03334	1.67719
	0.5	2.21868	1.22002
	1	1.02539	1.19343
	2	0.243732	1.29025
